# Supplementary material for: Different Gut Microbiomes of Developmental Stages of Field-Collected Native and Invasive Western Bean Cutworm, Striacosta albicosta, in Western Nebraska
Source: MDPI journal article supplement (doi:10.3390/microorganisms10091828), 2022-09-14

**Supplementary Figure S1:** Microbiome diversity sampling across developmental stages (egg, larvae, and adults) of field-collected western bean cutworm *Striacosta albicosta* and its dietary material. Rarefaction curves near saturation suggests complete sampling across samples.

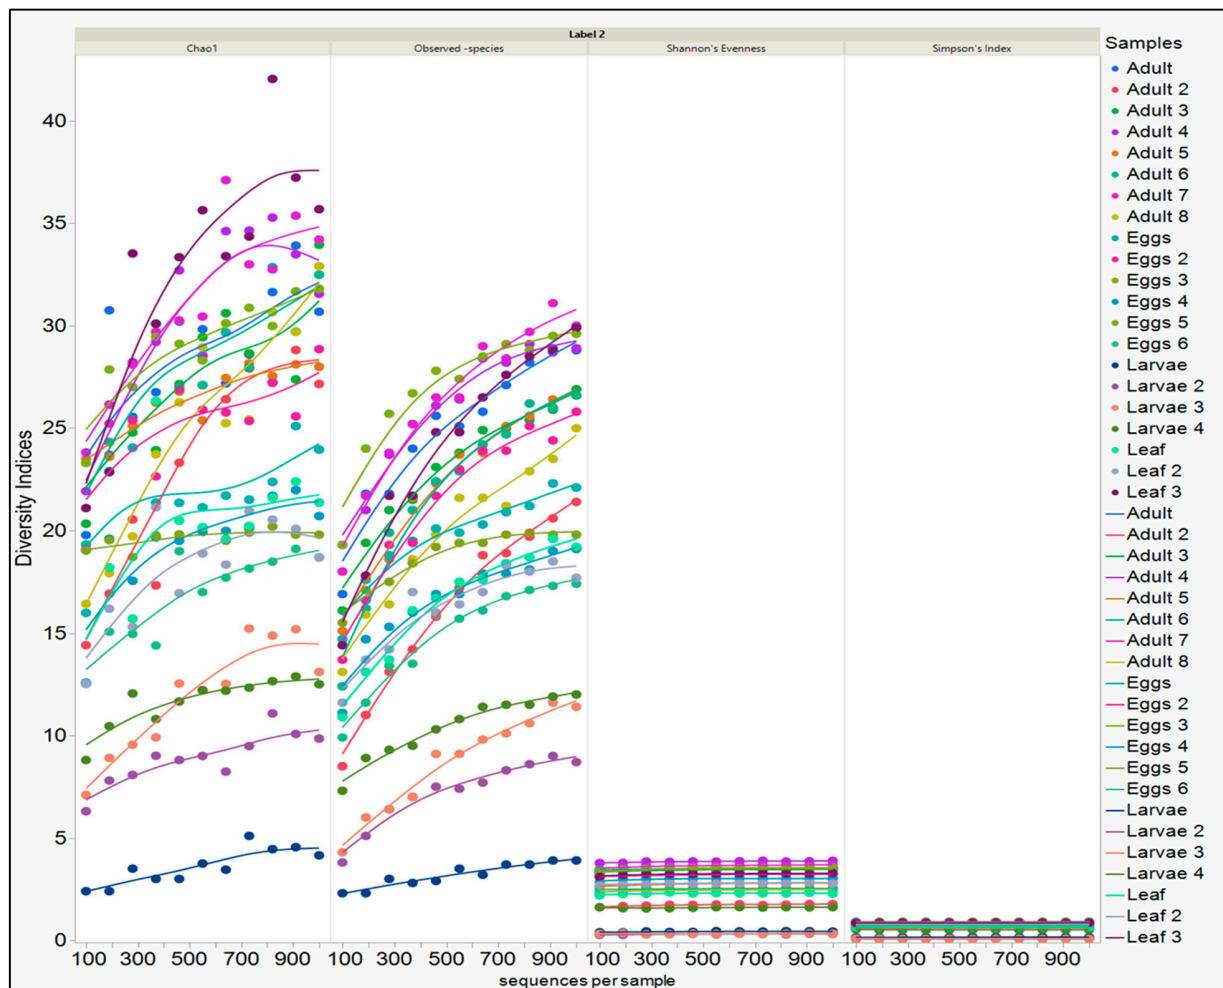

Supplement: s1 [file s1]
